# Supplementary material for: Recovery of novel association loci in Arabidopsis thaliana and Drosophila melanogaster through leveraging INDELs association and integrated burden test
Source: PubMed Central journal article supplement (PMC6203403; doi:10.1371/journal.pgen.1007699), 2018-10-16

## quantile-quantile plots of p-values

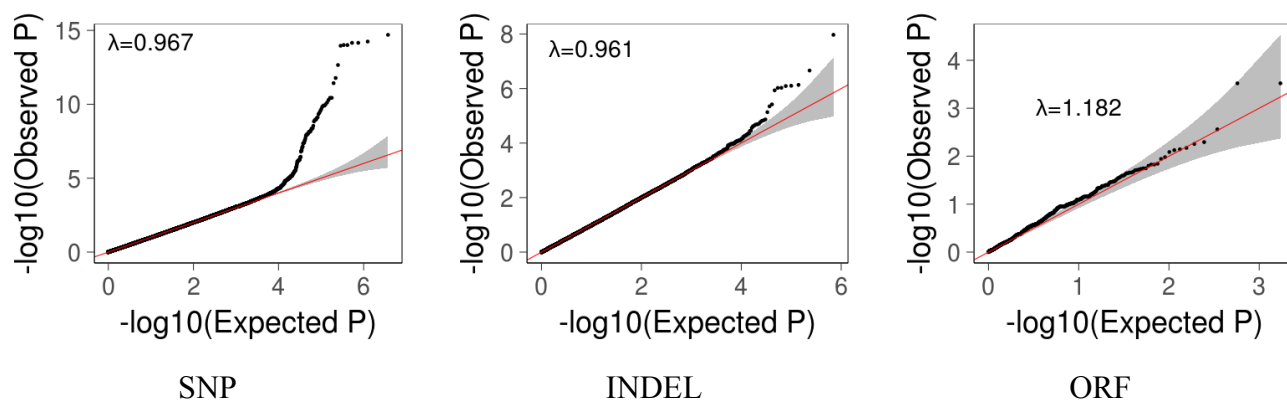

## SNP results

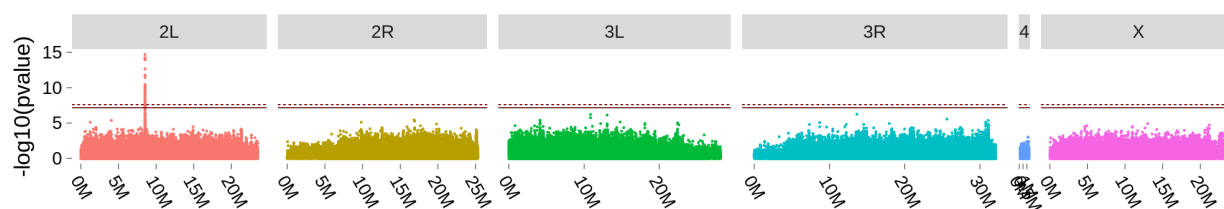

| Peak rank | Chr | SNP pos(bp) | $-\log_{10}(\text{pvalue})$ | Candidate gene ID | Candidate gene name | Distance to gene(bp) |
|-----------|-----|-------------|-----------------------------|-------------------|---------------------|----------------------|
| 1         | 2L  | 8520050     | 14.69851                    | NA                | NA                  | NA                   |

## INDEL results

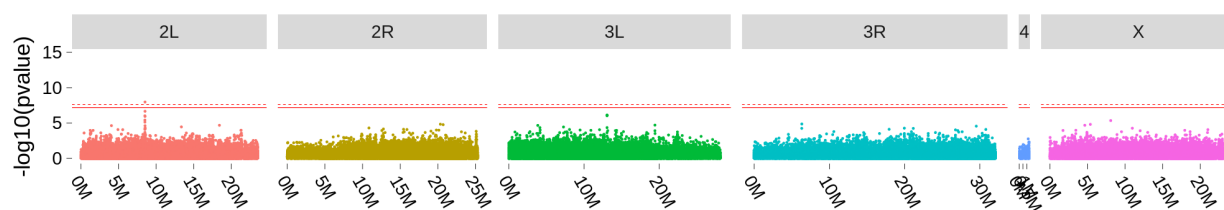

| Peak rank | Chr | INDEL pos(bp) | $-\log_{10}(\text{pvalue})$ | Candidate gene ID | Candidate gene name | Variation    | Distance to gene(bp) |
|-----------|-----|---------------|-----------------------------|-------------------|---------------------|--------------|----------------------|
| 1         | 2L  | 8528835       | 7.969892                    | NA                | NA                  | 1bp deletion | NA                   |

## ORFS results

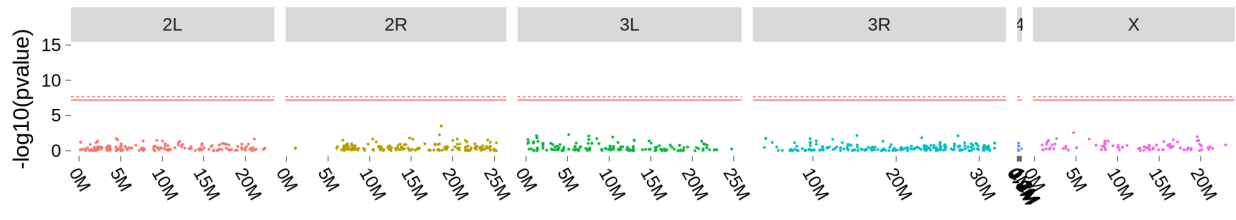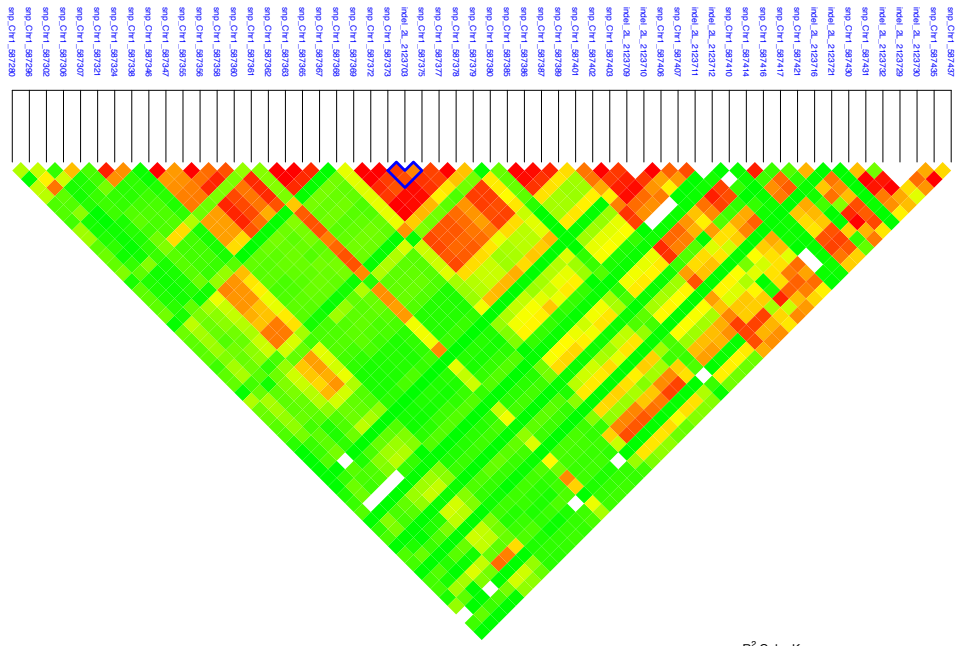

993, CH1, 987967  
 993, CH1, 987968  
 indel\_3L, 2123730  
 indel\_3L, 2123729  
 indel\_3L, 2123728  
 indel\_3L, 2123727  
 993, CH1, 987963  
 993, CH1, 987960  
 indel\_3L, 2123725  
 indel\_3L, 2123716  
 993, CH1, 987951  
 993, CH1, 987947  
 993, CH1, 987946  
 993, CH1, 987944  
 993, CH1, 987943  
 indel\_3L, 2123742  
 indel\_3L, 2123741  
 993, CH1, 987937  
 indel\_3L, 2123739  
 993, CH1, 987938  
 993, CH1, 987936  
 993, CH1, 987935  
 993, CH1, 987934  
 993, CH1, 987933  
 993, CH1, 987932  
 993, CH1, 987930  
 993, CH1, 987929  
 993, CH1, 987928  
 993, CH1, 987927  
 993, CH1, 987926  
 993, CH1, 987925  
 993, CH1, 987924  
 993, CH1, 987923  
 993, CH1, 987922  
 993, CH1, 987921  
 993, CH1, 987920  
 993, CH1, 987919  
 993, CH1, 987918  
 993, CH1, 987917  
 indel\_3L, 2123709  
 993, CH1, 987916  
 993, CH1, 987915  
 993, CH1, 987914  
 993, CH1, 987913  
 993, CH1, 987912  
 993, CH1, 987911  
 993, CH1, 987910  
 993, CH1, 987909  
 993, CH1, 987908  
 993, CH1, 987907  
 993, CH1, 987906  
 993, CH1, 987905  
 993, CH1, 987904  
 993, CH1, 987903  
 993, CH1, 987902  
 993, CH1, 987901  
 993, CH1, 987900  
 993, CH1, 987900  
 993, CH1, 987900  
 993, CH1, 987900  
 993, CH1, 987900

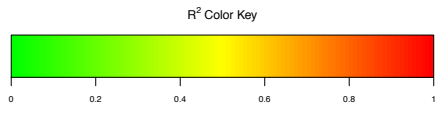

Supplement: pgen.1007699.s050.pdf [file pgen.1007699.s050.pdf]
