# Supplementary material for: Recovery of novel association loci in Arabidopsis thaliana and Drosophila melanogaster through leveraging INDELs association and integrated burden test
Source: PubMed Central journal article supplement (PMC6203403; doi:10.1371/journal.pgen.1007699), 2018-10-16

quantile-quantile plots of p-values

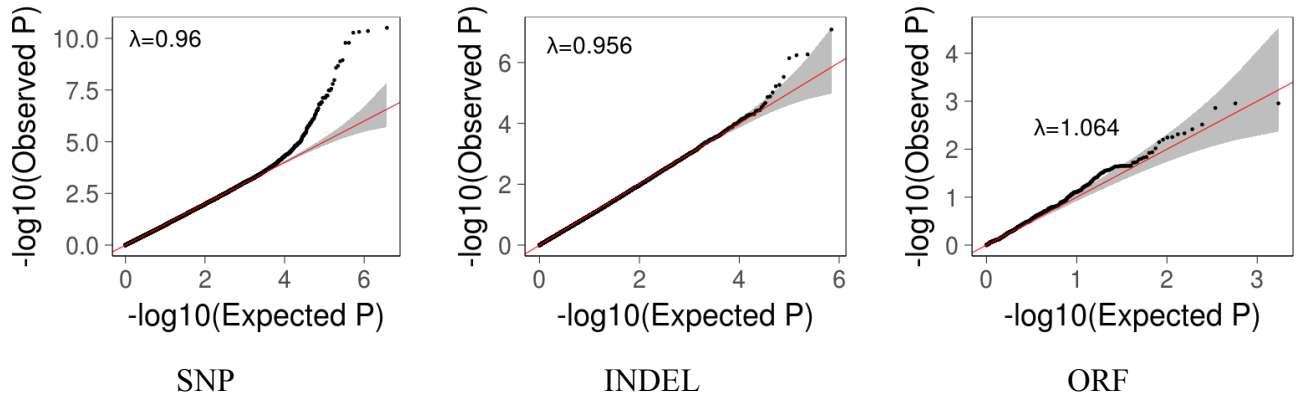

SNP results

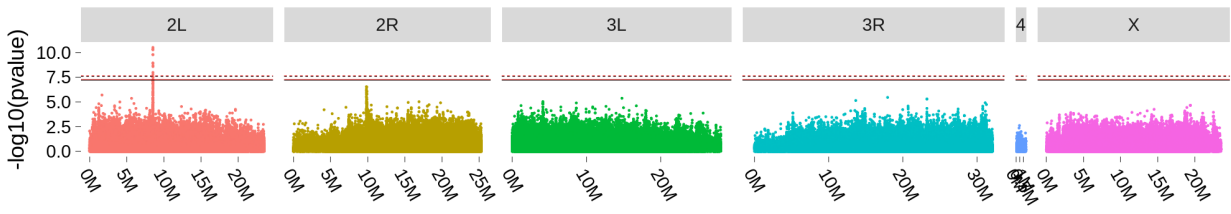

| Peak rank | Chr | SNP pos(bp) | $-\log_{10}(pvalue)$ | Candidate gene ID | Candidate gene name | Distance to gene(bp) |
|-----------|-----|-------------|----------------------|-------------------|---------------------|----------------------|
| 1         | 2L  | 8521332     | 10.59687             | NA                | NA                  | NA                   |

INDEL results

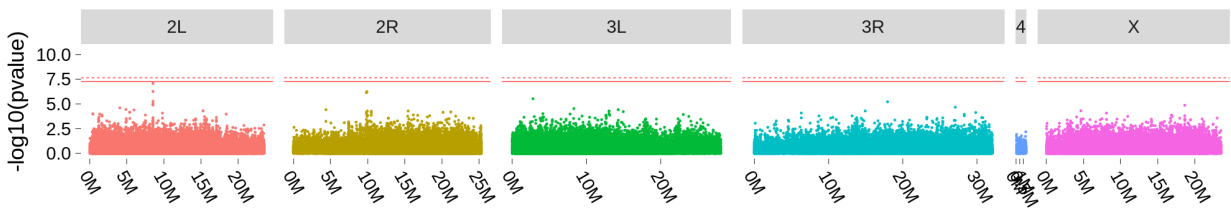

ORFS results

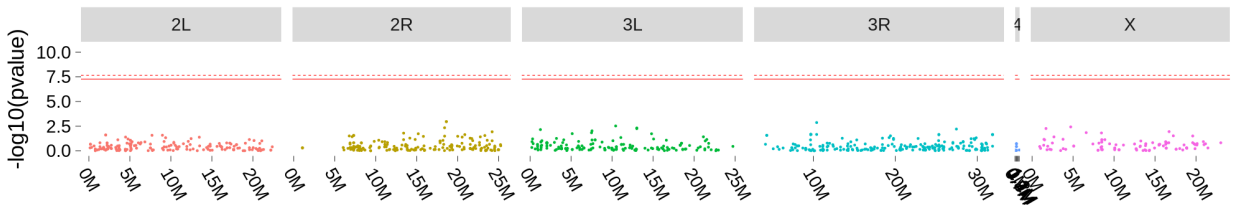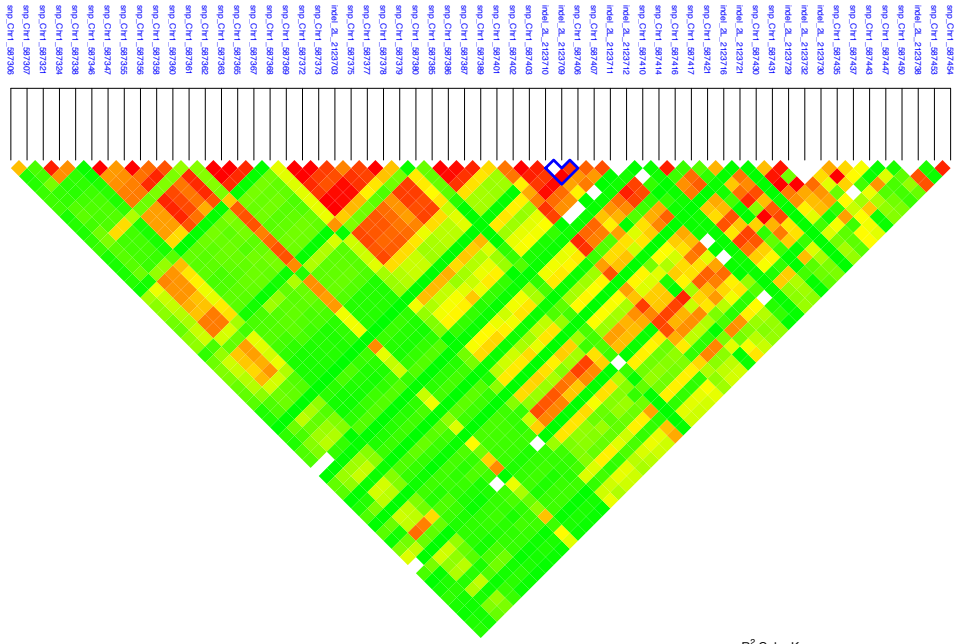

993, Chr1, 987454  
 993, Chr1, 987453  
 993, Chr1, 987452  
 993, Chr1, 987451  
 993, Chr1, 987450  
 993, Chr1, 987449  
 993, Chr1, 987448  
 993, Chr1, 987447  
 993, Chr1, 987446  
 993, Chr1, 987445  
 993, Chr1, 987444  
 993, Chr1, 987443  
 993, Chr1, 987442  
 993, Chr1, 987441  
 993, Chr1, 987440  
 993, Chr1, 987439  
 993, Chr1, 987438  
 993, Chr1, 987437  
 993, Chr1, 987436  
 993, Chr1, 987435  
 993, Chr1, 987434  
 993, Chr1, 987433  
 993, Chr1, 987432  
 993, Chr1, 987431  
 993, Chr1, 987430  
 993, Chr1, 987429  
 993, Chr1, 987428  
 993, Chr1, 987427  
 993, Chr1, 987426  
 993, Chr1, 987425  
 993, Chr1, 987424  
 993, Chr1, 987423  
 993, Chr1, 987422  
 993, Chr1, 987421  
 993, Chr1, 987420  
 993, Chr1, 987419  
 993, Chr1, 987418  
 993, Chr1, 987417  
 993, Chr1, 987416  
 993, Chr1, 987415  
 993, Chr1, 987414  
 993, Chr1, 987413  
 993, Chr1, 987412  
 993, Chr1, 987411  
 993, Chr1, 987410  
 993, Chr1, 987409  
 993, Chr1, 987408  
 993, Chr1, 987407  
 993, Chr1, 987406  
 993, Chr1, 987405  
 993, Chr1, 987404  
 993, Chr1, 987403  
 993, Chr1, 987402  
 993, Chr1, 987401  
 993, Chr1, 987400  
 993, Chr1, 987399  
 993, Chr1, 987398  
 993, Chr1, 987397  
 993, Chr1, 987396  
 993, Chr1, 987395  
 993, Chr1, 987394  
 993, Chr1, 987393  
 993, Chr1, 987392  
 993, Chr1, 987391  
 993, Chr1, 987390  
 993, Chr1, 987389  
 993, Chr1, 987388  
 993, Chr1, 987387  
 993, Chr1, 987386  
 993, Chr1, 987385  
 993, Chr1, 987384  
 993, Chr1, 987383  
 993, Chr1, 987382  
 993, Chr1, 987381  
 993, Chr1, 987380

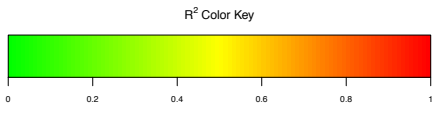

Supplement: pgen.1007699.s051.pdf [file pgen.1007699.s051.pdf]
