# Supplementary material for: Recovery of novel association loci in Arabidopsis thaliana and Drosophila melanogaster through leveraging INDELs association and integrated burden test
Source: PubMed Central journal article supplement (PMC6203403; doi:10.1371/journal.pgen.1007699), 2018-10-16

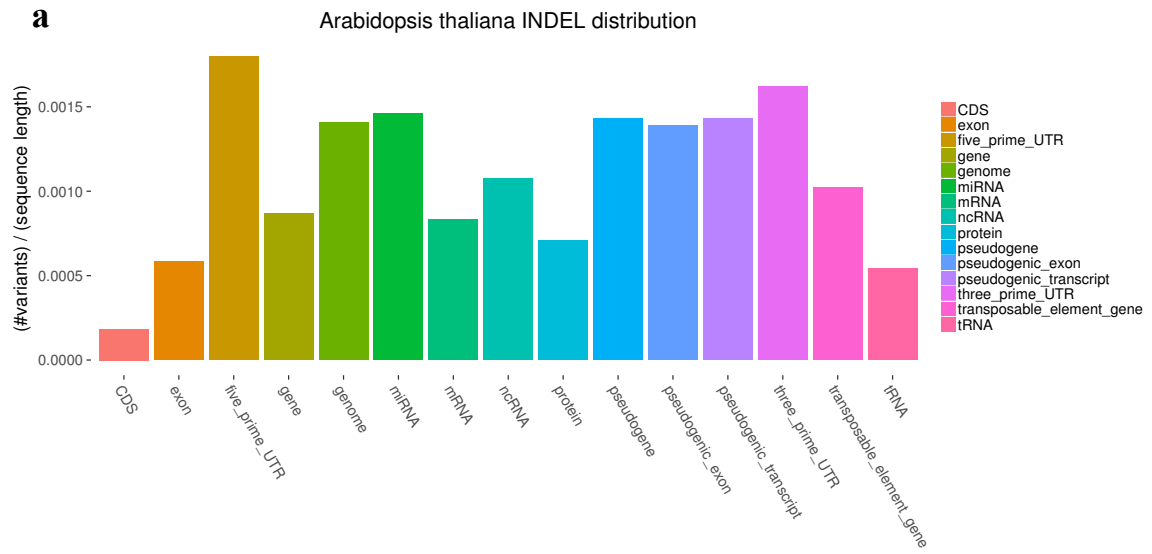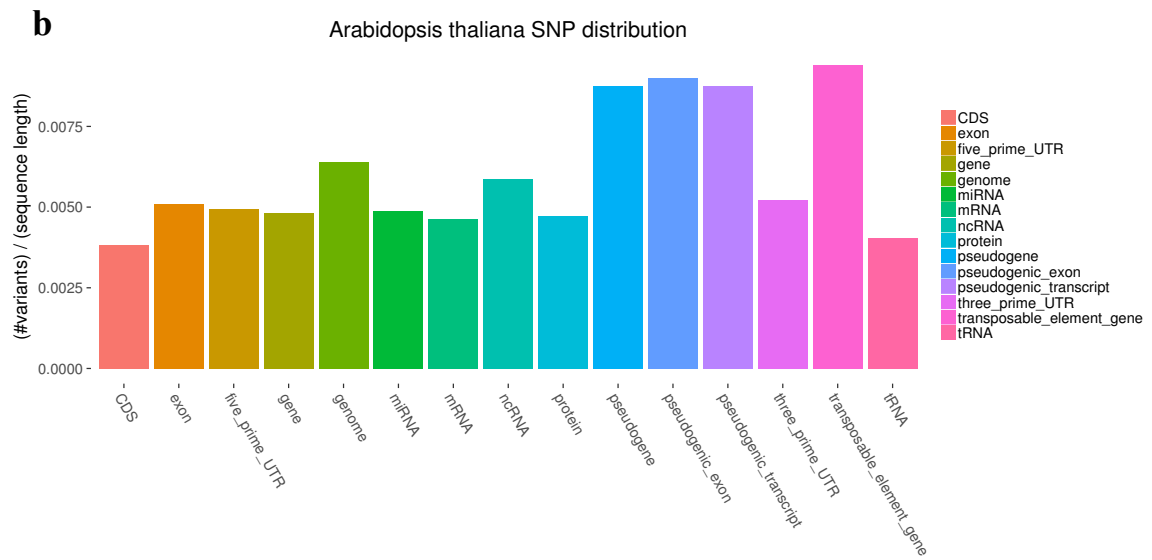

**c**

Drosophila melanogaster INDEL distribution

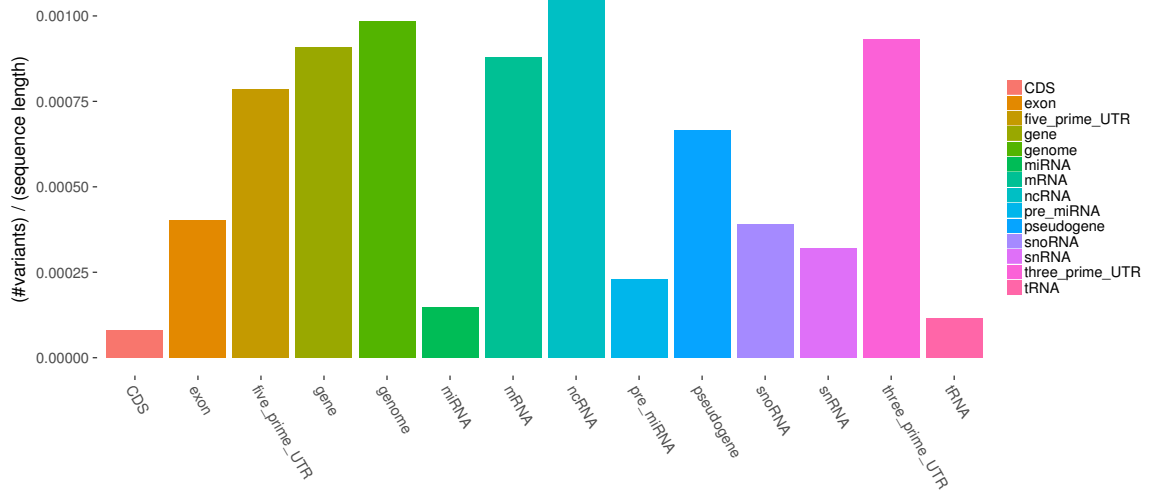**d**

Drosophila melanogaster SNP distribution

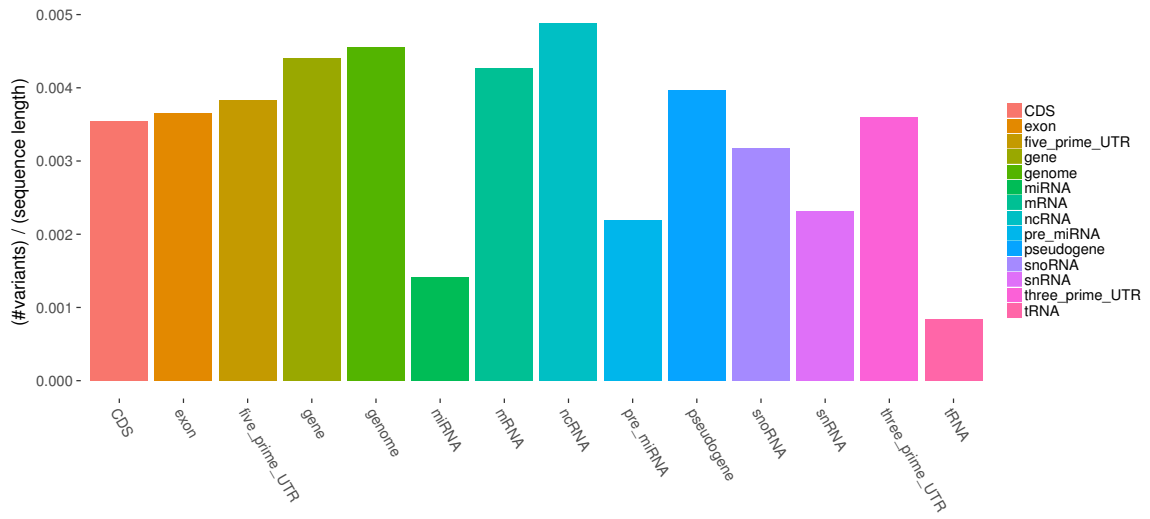

Supplement: pgen.1007699.s005.pdf [file pgen.1007699.s005.pdf]
