# Supplementary material for: Recovery of novel association loci in Arabidopsis thaliana and Drosophila melanogaster through leveraging INDELs association and integrated burden test
Source: PubMed Central journal article supplement (PMC6203403; doi:10.1371/journal.pgen.1007699), 2018-10-16

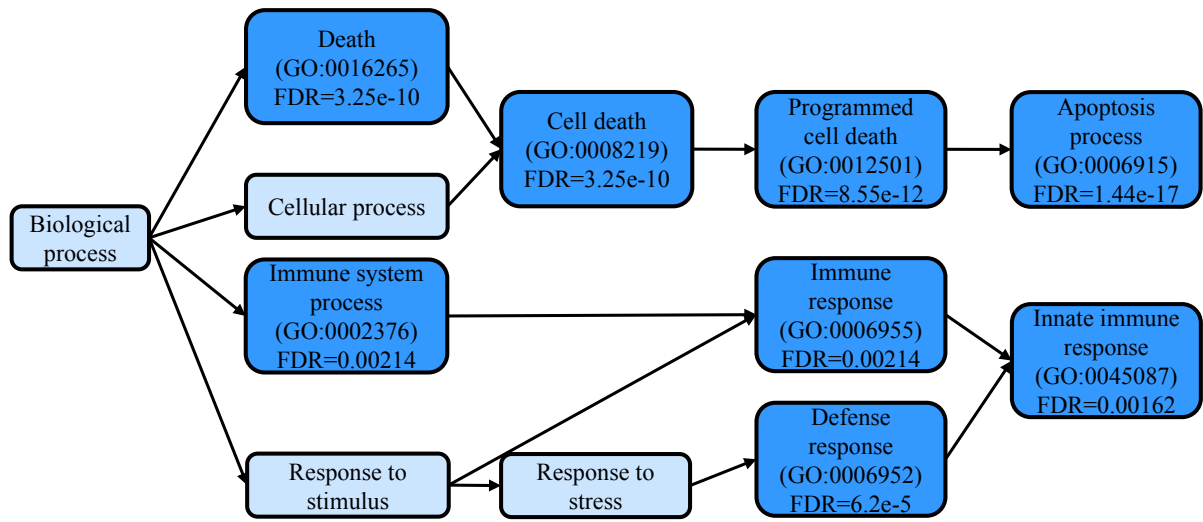

Supplement: pgen.1007699.s011.pdf [file pgen.1007699.s011.pdf]
