# Supplementary material for: Recovery of novel association loci in Arabidopsis thaliana and Drosophila melanogaster through leveraging INDELs association and integrated burden test
Source: PubMed Central journal article supplement (PMC6203403; doi:10.1371/journal.pgen.1007699), 2018-10-16

## Phenotype histogram and quantile-quantile plots of p-values

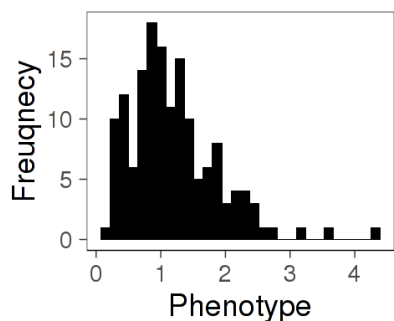

Original phenotype distribution

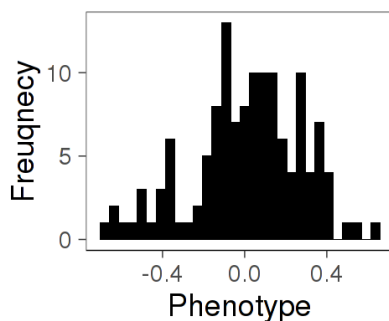

Transformed phenotype distribution

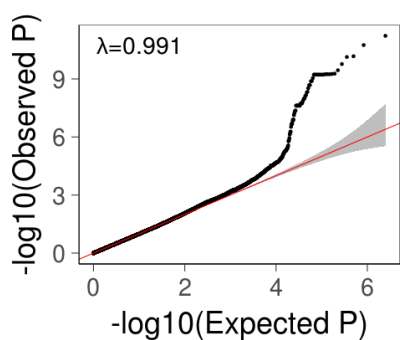

SNP

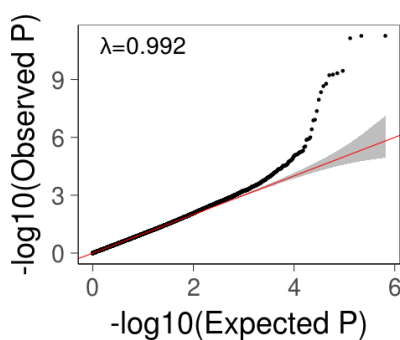

INDEL

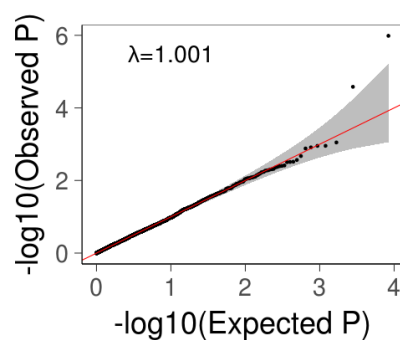

ORF

## SNP results

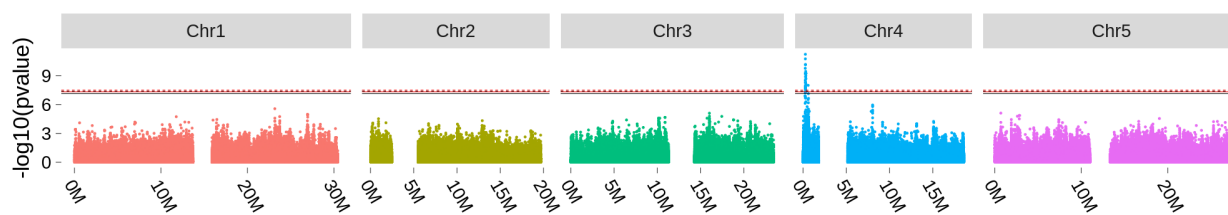

| Peak rank | Chr | SNP pos(bp) | $-\log_{10}(\text{pvalue})$ | Candidate gene ID | Candidate gene name | Distance to gene(bp) |
|-----------|-----|-------------|-----------------------------|-------------------|---------------------|----------------------|
| 1         | 4   | 262690      | 11.22611                    | AT4G00650         | FRI                 | 6336                 |
| 2         | 4   | 583422      | 7.995266                    | NA                | NA                  | NA                   |

## INDEL results

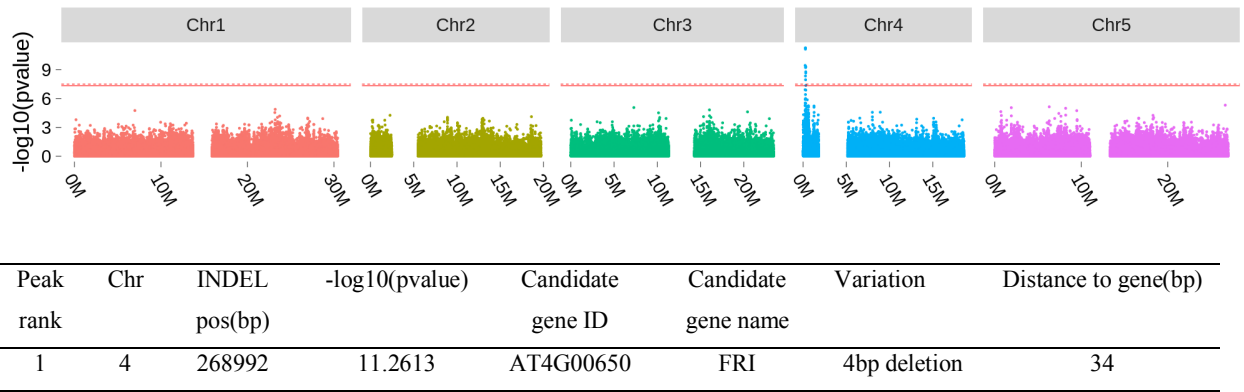

### ORFS results

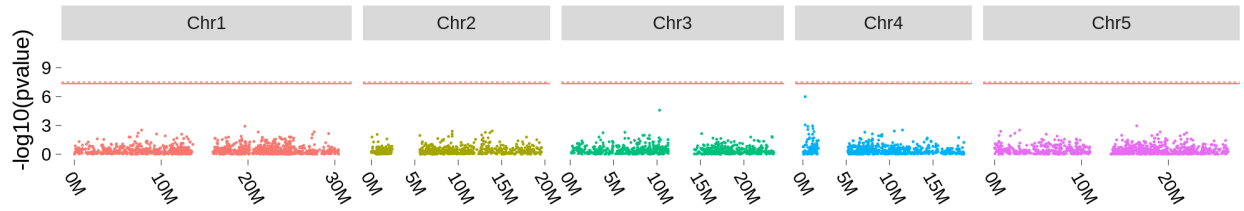

### LD pattern nearby the significant INDEL

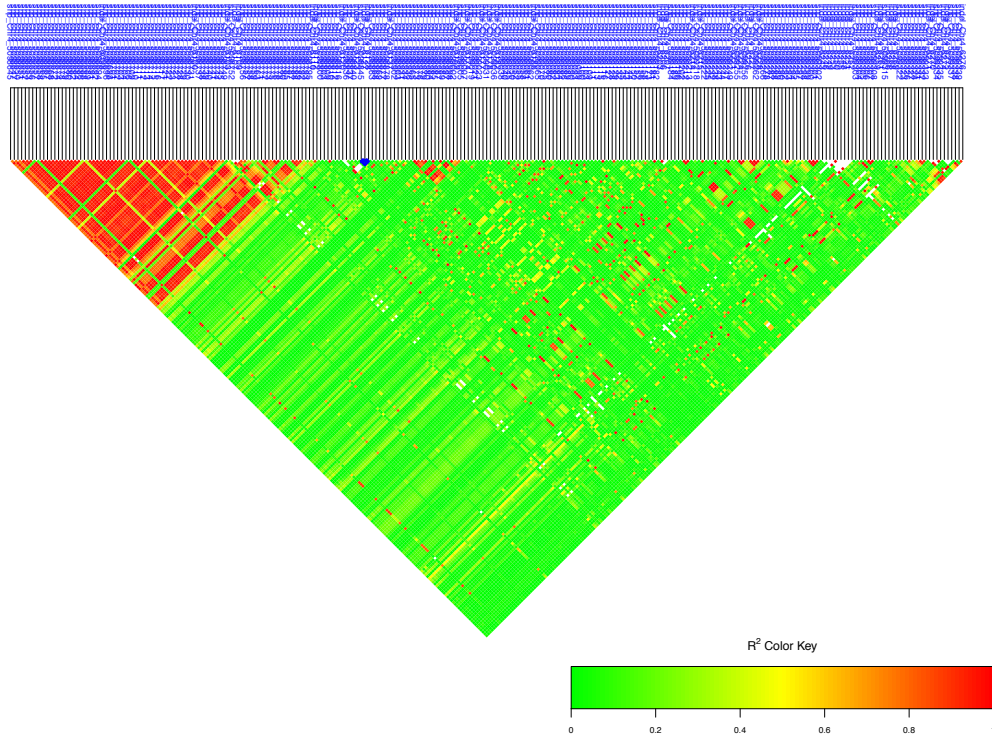

Supplement: pgen.1007699.s019.pdf [file pgen.1007699.s019.pdf]
