# Supplementary material for: Recovery of novel association loci in Arabidopsis thaliana and Drosophila melanogaster through leveraging INDELs association and integrated burden test
Source: PubMed Central journal article supplement (PMC6203403; doi:10.1371/journal.pgen.1007699), 2018-10-16
Supplement: pgen.1007699.s023.pdf [file pgen.1007699.s023.pdf]

## Phenotype histogram and quantile-quantile plots of p-values

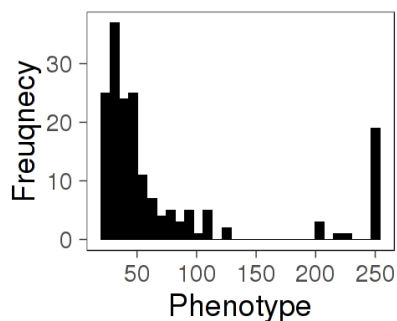

Original phenotype distribution

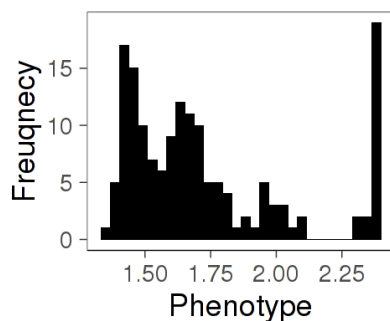

Transformed phenotype distribution

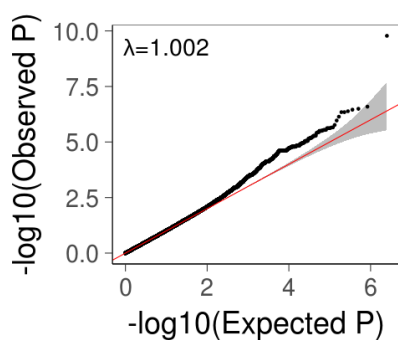

SNP

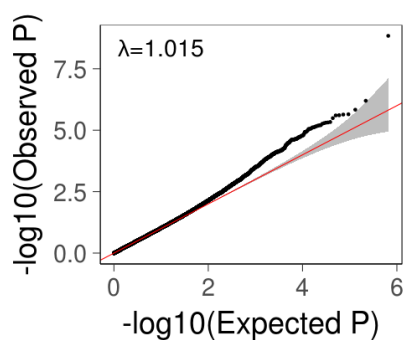

INDEL

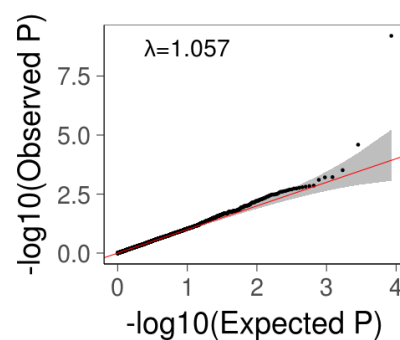

ORF

## SNP results

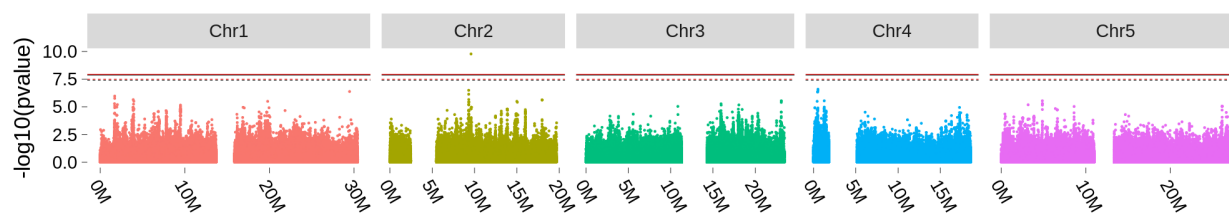

| Peak rank | Chr | SNP pos(bp) | $-\log_{10}(\text{pvalue})$ | Candidate gene ID | Candidate gene name | Distance to gene(bp) |
|-----------|-----|-------------|-----------------------------|-------------------|---------------------|----------------------|
| 1         | 2   | 9581436     | 9.778797                    | AT2G22540         | SVP                 | 0                    |

## INDEL results

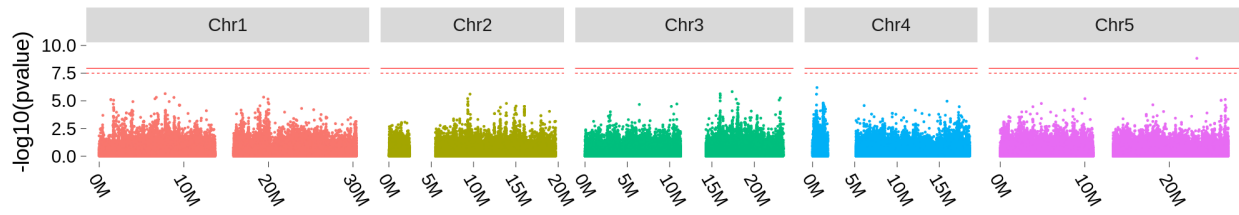

| Peak rank | Chr | INDEL pos(bp) | $-\log_{10}(\text{pvalue})$ | Candidate gene ID | Candidate gene name | Variation    | Distance to gene(bp) |
|-----------|-----|---------------|-----------------------------|-------------------|---------------------|--------------|----------------------|
| 1         | 5   | 23249423      | 8.84059                     | AT5G57380         | VIN3                | 4bp deletion | 0                    |

### ORFS results

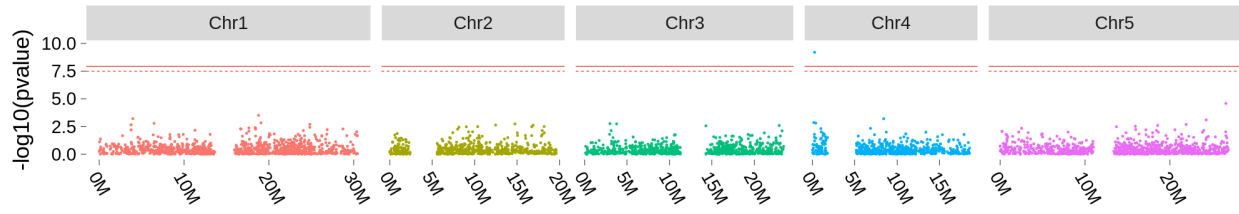

| Peak rank | Chr | $-\log_{10}(\text{pvalue})$ | Candidate gene ID | Candidate gene name |
|-----------|-----|-----------------------------|-------------------|---------------------|
| 1         | 4   | 8.740229                    | AT4G00650         | FRI                 |
