# Supplementary material for: Recovery of novel association loci in Arabidopsis thaliana and Drosophila melanogaster through leveraging INDELs association and integrated burden test
Source: PubMed Central journal article supplement (PMC6203403; doi:10.1371/journal.pgen.1007699), 2018-10-16
Supplement: pgen.1007699.s025.pdf [file pgen.1007699.s025.pdf]

## Phenotype histogram and quantile-quantile plots of p-values

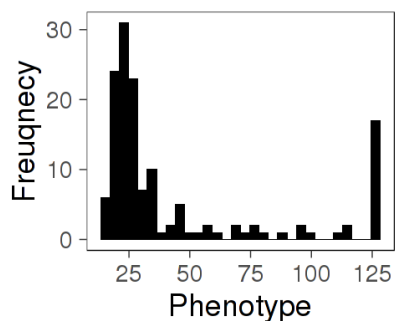

Original phenotype distribution

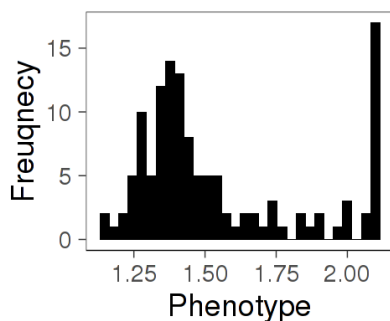

Transformed phenotype distribution

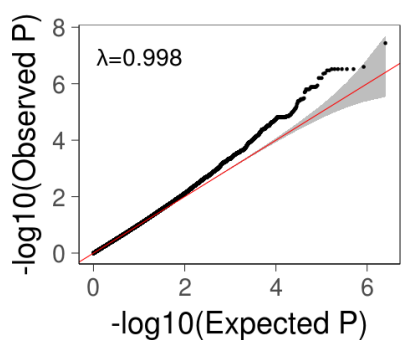

SNP

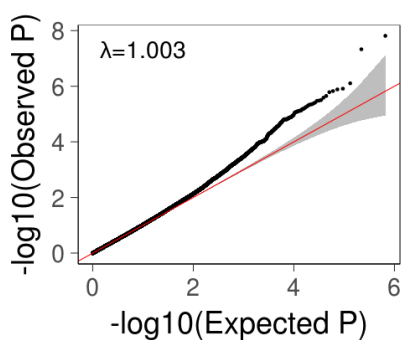

INDEL

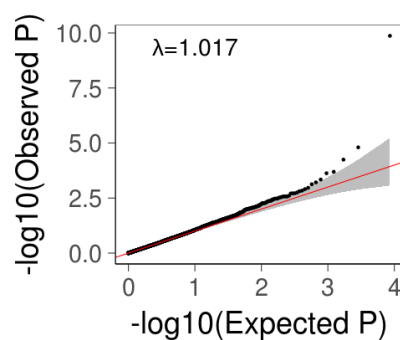

ORF

## SNP results

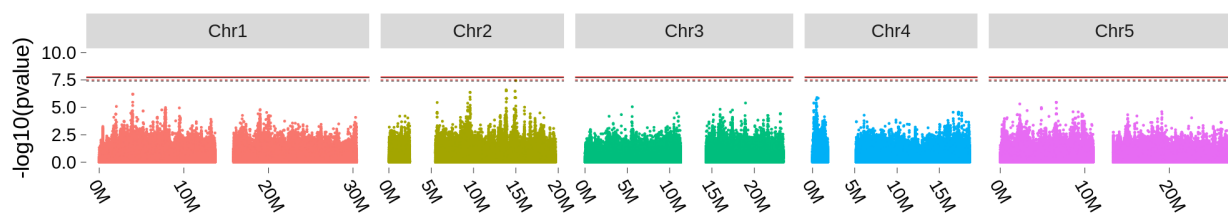

## INDEL results

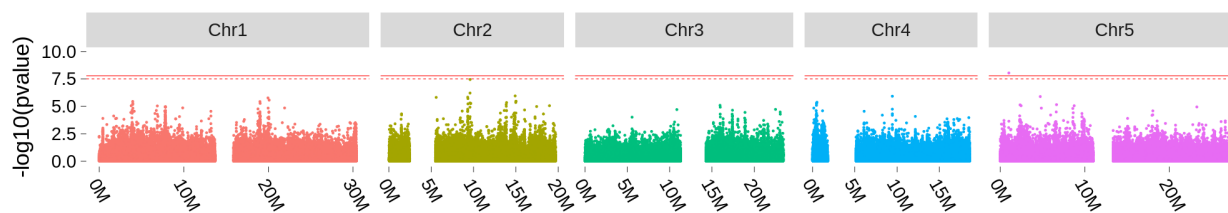

| Peak | Chr | INDEL | $-\log_{10}(\text{pvalue})$ | Candidate | Candidate | Variation | Distance to gene(bp) |
|------|-----|-------|-----------------------------|-----------|-----------|-----------|----------------------|
|------|-----|-------|-----------------------------|-----------|-----------|-----------|----------------------|

| rank | pos(bp) | gene ID                    | gene name          |
|------|---------|----------------------------|--------------------|
| 1    | 5       | 1026045 7.811765 AT5G03840 | TFL1 1bp insertion |

### ORFS results

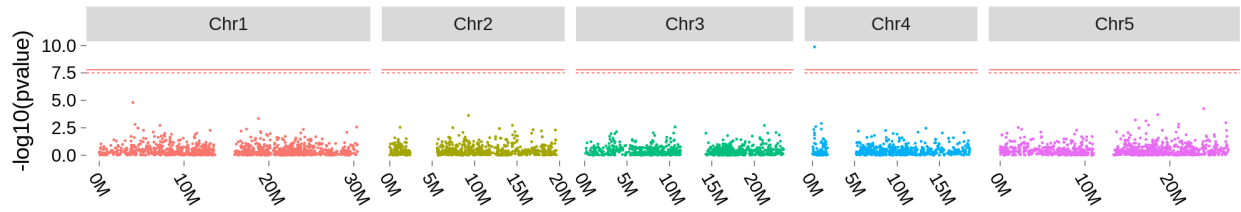

| Peak rank | Chr | -log10(pvalue) | Candidate gene ID | Candidate gene name |
|-----------|-----|----------------|-------------------|---------------------|
| 1         | 4   | 9.868338       | AT4G00650         | FRI                 |
