# Supplementary material for: Recovery of novel association loci in Arabidopsis thaliana and Drosophila melanogaster through leveraging INDELs association and integrated burden test
Source: PubMed Central journal article supplement (PMC6203403; doi:10.1371/journal.pgen.1007699), 2018-10-16

## Phenotype histogram and quantile-quantile plots of p-values

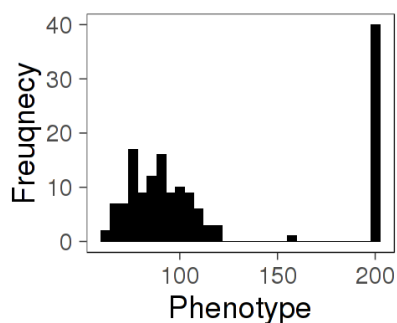

Original phenotype distribution

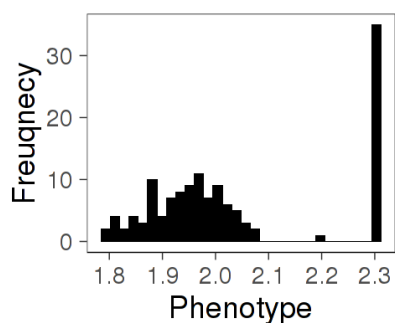

Transformed phenotype distribution

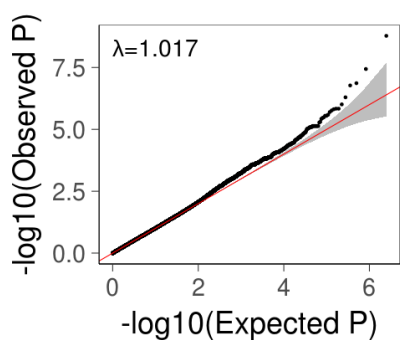

SNP

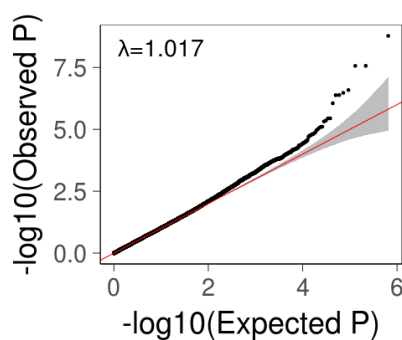

INDEL

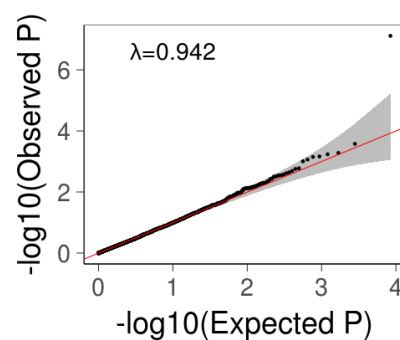

ORF

## SNP results

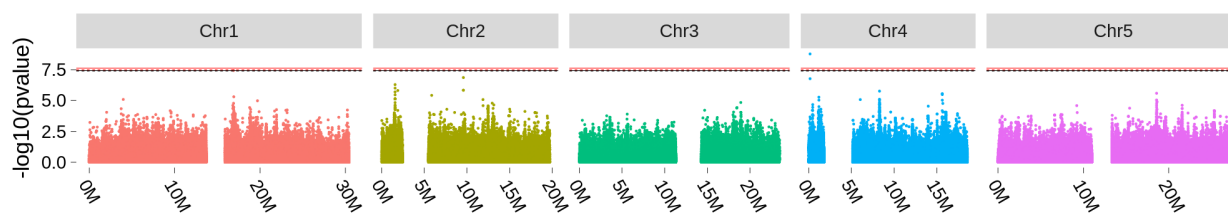

| Peak rank | Chr | SNP pos(bp) | -log10(pvalue) | Candidate gene ID | Candidate gene name | Distance to gene(bp) |
|-----------|-----|-------------|----------------|-------------------|---------------------|----------------------|
| 1         | 4   | 153182      | 8.780621       | NA                | NA                  | NA                   |

## INDEL results

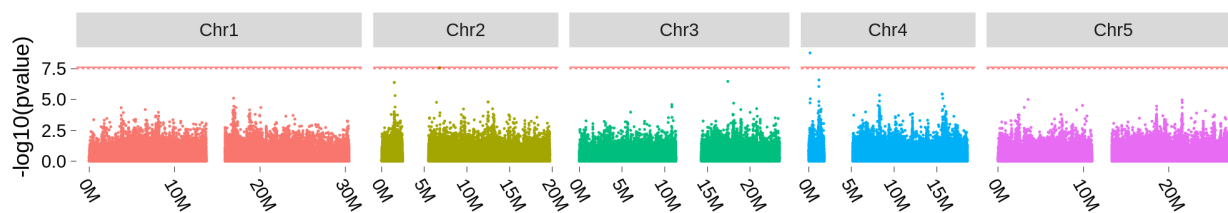

| Peak rank | Chr | INDEL pos(bp) | $-\log_{10}(\text{pvalue})$ | Candidate gene ID | Candidate gene name | Variation    | Distance to gene(bp) |
|-----------|-----|---------------|-----------------------------|-------------------|---------------------|--------------|----------------------|
| 1         | 4   | 153183        | 8.780621                    | NA                | NA                  | 1bp deletion | NA                   |

### ORFS results

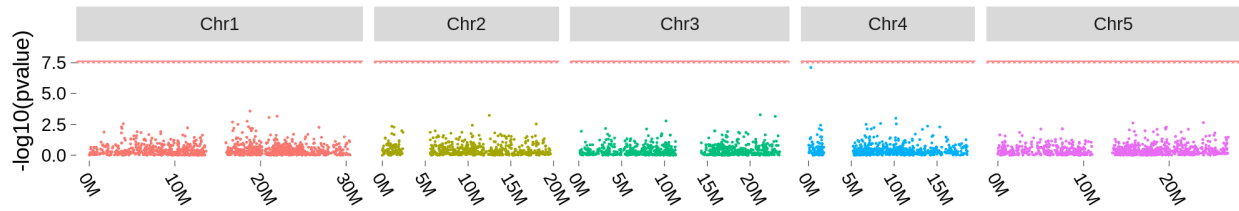

Supplement: pgen.1007699.s031.pdf [file pgen.1007699.s031.pdf]
