# Supplementary material for: Recovery of novel association loci in Arabidopsis thaliana and Drosophila melanogaster through leveraging INDELs association and integrated burden test
Source: PubMed Central journal article supplement (PMC6203403; doi:10.1371/journal.pgen.1007699), 2018-10-16

## Phenotype histogram and quantile-quantile plots of p-values

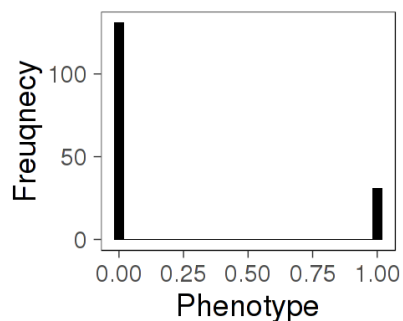

Original phenotype distribution

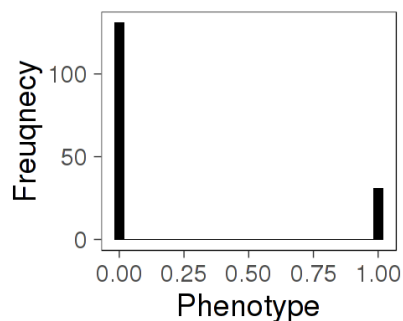

Transformed phenotype distribution

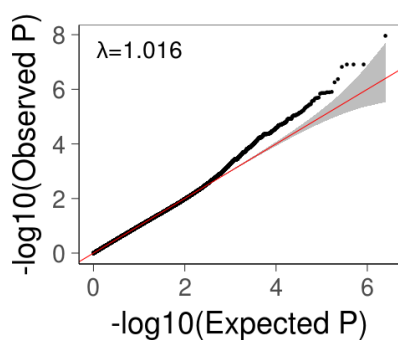

SNP

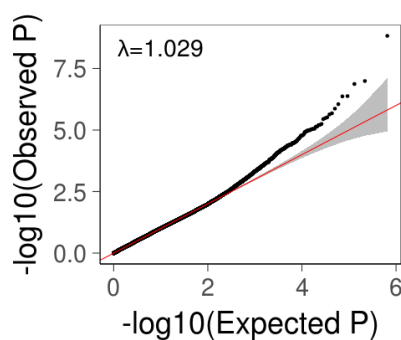

INDEL

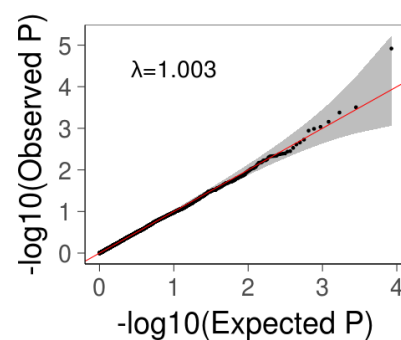

ORF

## SNP results

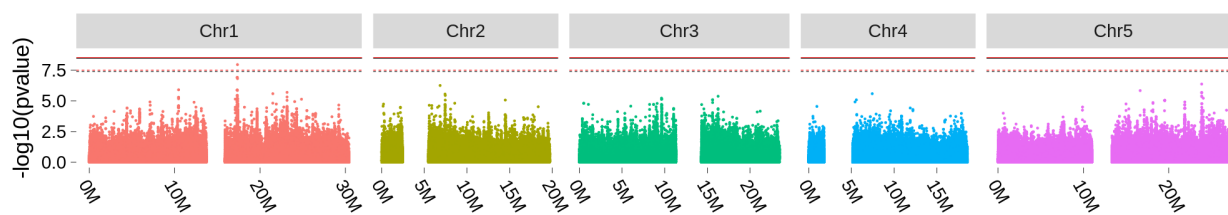

## INDEL results

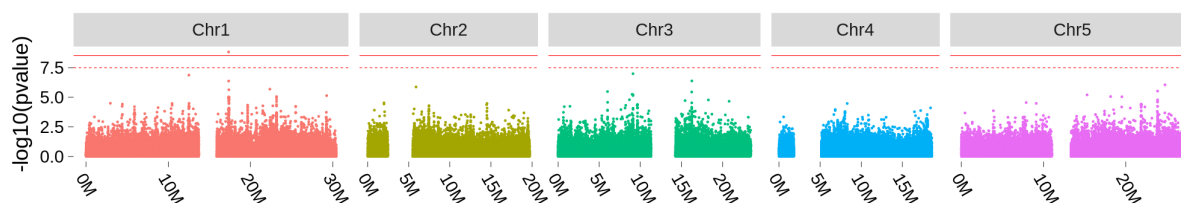

| Peak | Chr | INDEL | -log10(pvalue) | Candidate | Candidate | Variation | Distance to gene(bp) |
|------|-----|-------|----------------|-----------|-----------|-----------|----------------------|
|------|-----|-------|----------------|-----------|-----------|-----------|----------------------|

| rank | pos(bp)    | gene ID  | gene name |
|------|------------|----------|-----------|
| 1    | 1 17334849 | 8.827714 | NA        |

### ORFS results

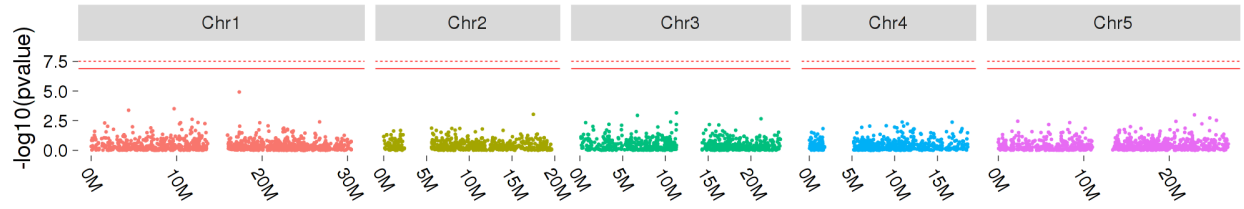

Supplement: pgen.1007699.s044.pdf [file pgen.1007699.s044.pdf]
