# Supplementary material for: Recovery of novel association loci in Arabidopsis thaliana and Drosophila melanogaster through leveraging INDELs association and integrated burden test
Source: PubMed Central journal article supplement (PMC6203403; doi:10.1371/journal.pgen.1007699), 2018-10-16

quantile-quantile plots of p-values

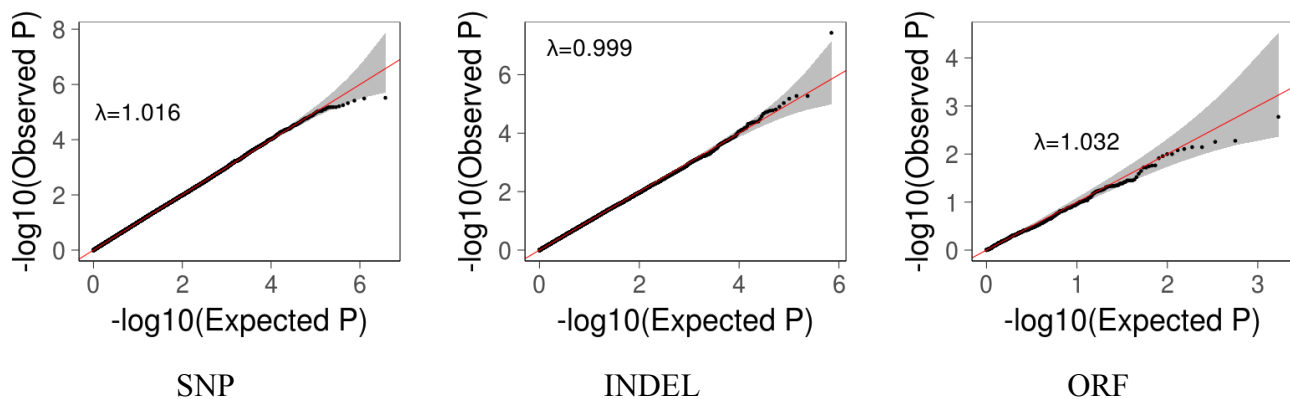

SNP results

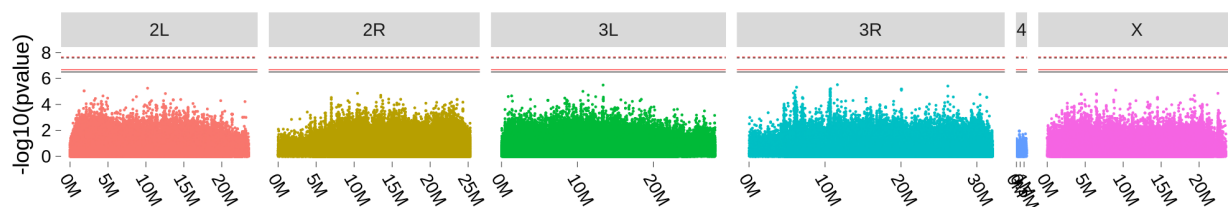

INDEL results

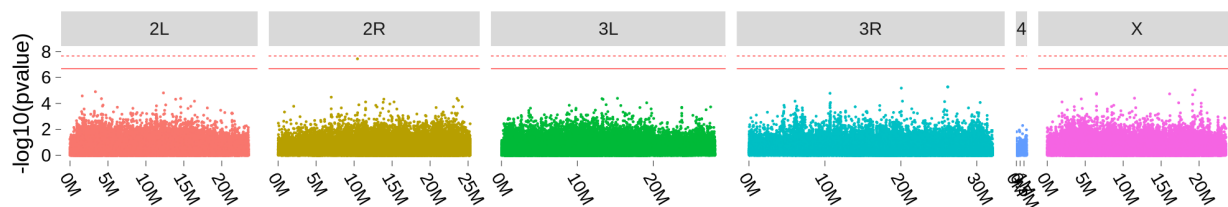

| Peak rank | Chr | INDEL pos(bp) | $-\log_{10}(\text{pvalue})$ | Candidate gene ID | Candidate gene name | Variation    | Distance to gene(bp) |
|-----------|-----|---------------|-----------------------------|-------------------|---------------------|--------------|----------------------|
| 1         | 2R  | 10442774      | 7.43271                     | FBgn0001122       | G- $\alpha$ 47A     | 3bp deletion | 0                    |

ORFS results

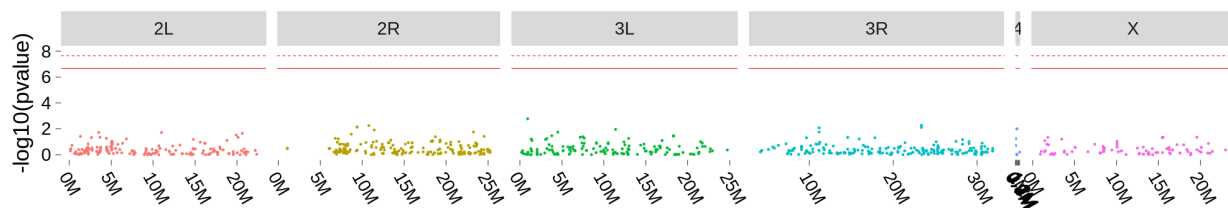

Supplement: pgen.1007699.s052.pdf [file pgen.1007699.s052.pdf]
