# Supplementary material for: Recovery of novel association loci in Arabidopsis thaliana and Drosophila melanogaster through leveraging INDELs association and integrated burden test
Source: PubMed Central journal article supplement (PMC6203403; doi:10.1371/journal.pgen.1007699), 2018-10-16

quantile-quantile plots of p-values

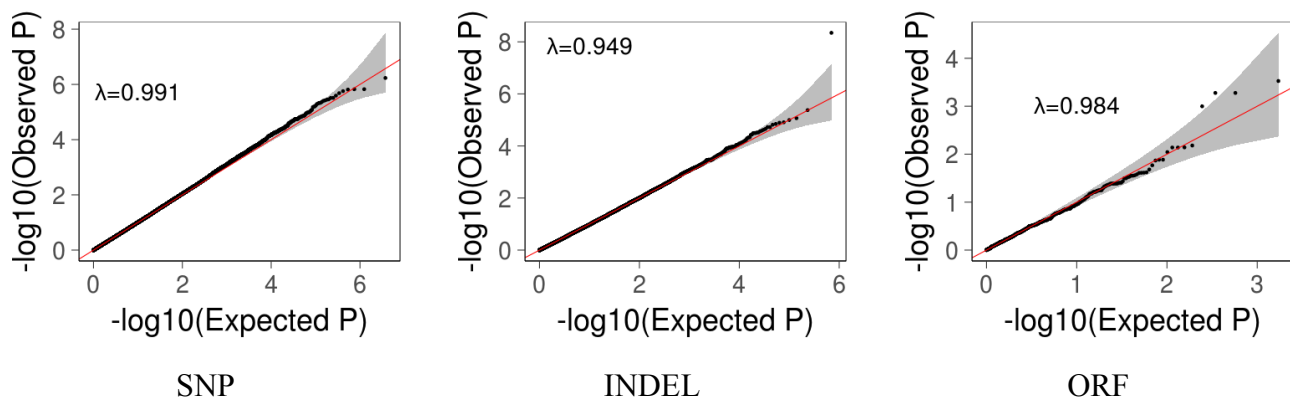

SNP results

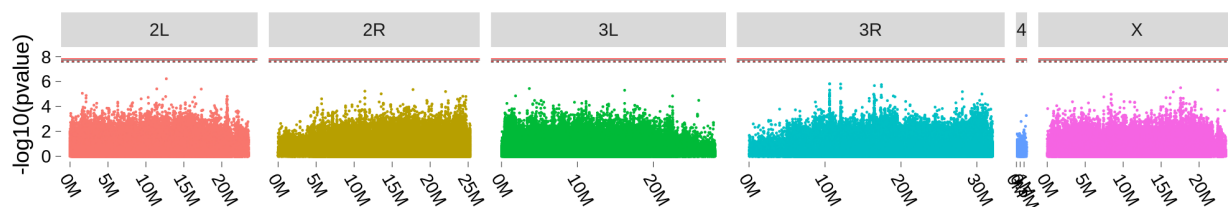

INDEL results

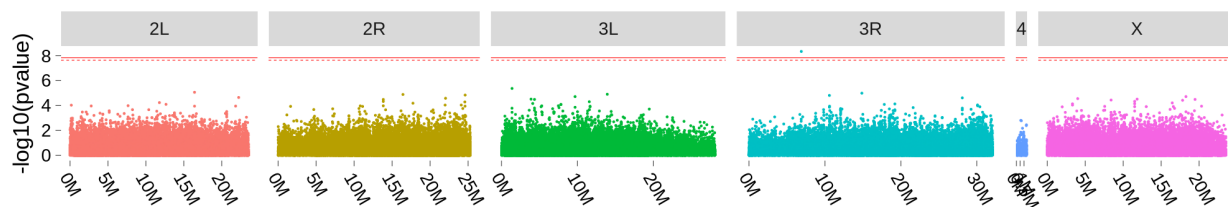

| Peak rank | Chr | INDEL pos(bp) | $-\log_{10}(pvalue)$ | Candidate gene ID | Candidate gene name | Variation     | Distance to gene(bp) |
|-----------|-----|---------------|----------------------|-------------------|---------------------|---------------|----------------------|
| 1         | 3R  | 6892261       | 8.345634             | NA                | NA                  | 12bp deletion | NA                   |

ORFS results

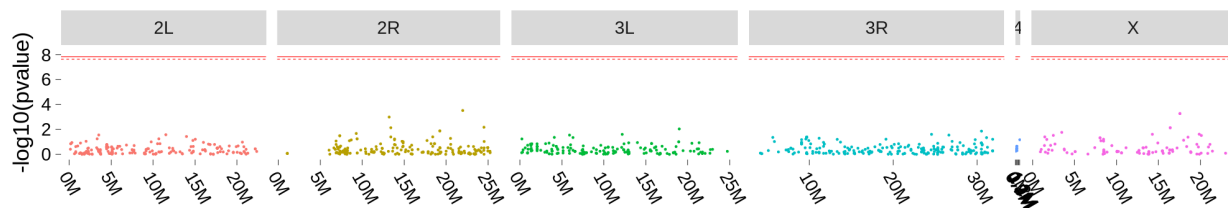

Supplement: pgen.1007699.s055.pdf [file pgen.1007699.s055.pdf]
