# Supplementary material for: Recovery of novel association loci in Arabidopsis thaliana and Drosophila melanogaster through leveraging INDELs association and integrated burden test
Source: PubMed Central journal article supplement (PMC6203403; doi:10.1371/journal.pgen.1007699), 2018-10-16

## quantile-quantile plots of p-values

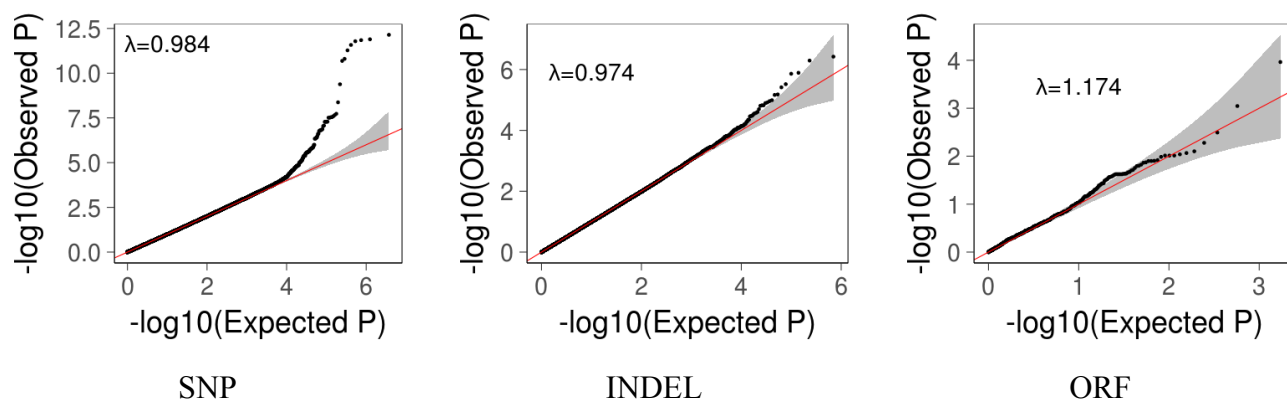

## SNP results

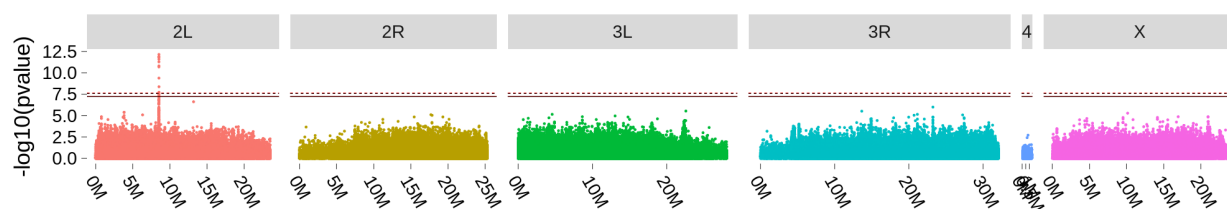

| Peak rank | Chr | SNP pos(bp) | $-\log_{10}(\text{pvalue})$ | Candidate gene ID | Candidate gene name | Distance to gene(bp) |
|-----------|-----|-------------|-----------------------------|-------------------|---------------------|----------------------|
| 1         | 2L  | 8520294     | 12.14315                    | NA                | NA                  | NA                   |

## INDEL results

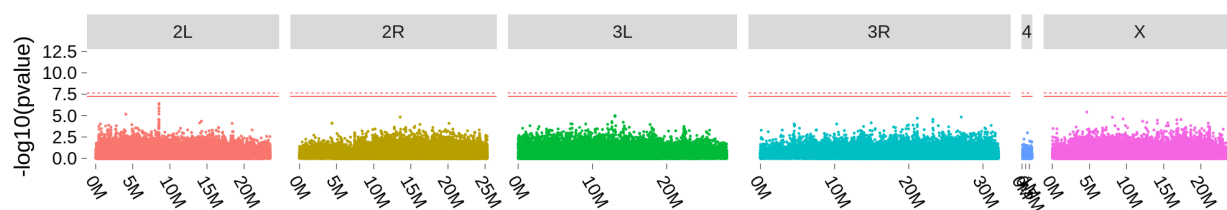

## ORFS results

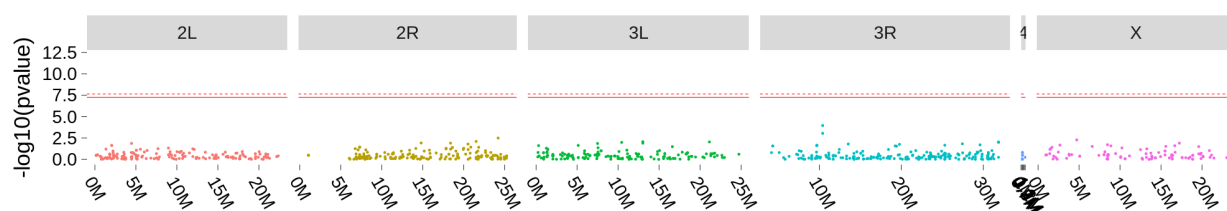

Supplement: pgen.1007699.s057.pdf [file pgen.1007699.s057.pdf]
