# Supplementary material for: Recovery of novel association loci in Arabidopsis thaliana and Drosophila melanogaster through leveraging INDELs association and integrated burden test
Source: PubMed Central journal article supplement (PMC6203403; doi:10.1371/journal.pgen.1007699), 2018-10-16

### quantile-quantile plots of p-values

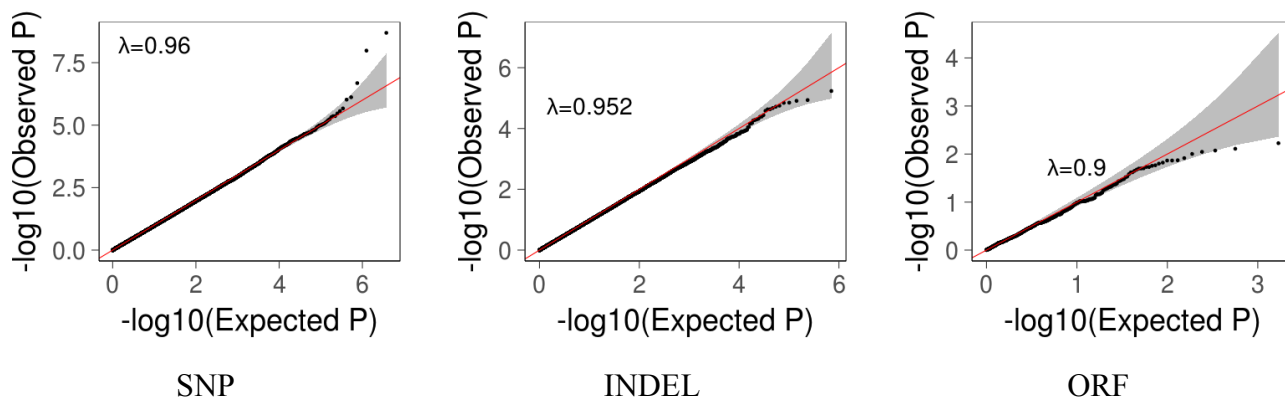

### SNP results

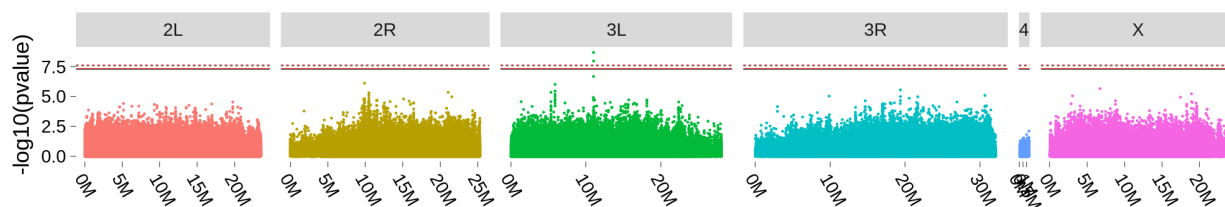

| Peak rank | Chr | SNP pos(bp) | $-\log_{10}(pvalue)$ | Candidate gene ID | Candidate gene name | Distance to gene(bp) |
|-----------|-----|-------------|----------------------|-------------------|---------------------|----------------------|
| 1         | 3L  | 11023519    | 8.694438             | NA                | NA                  | NA                   |

### INDEL results

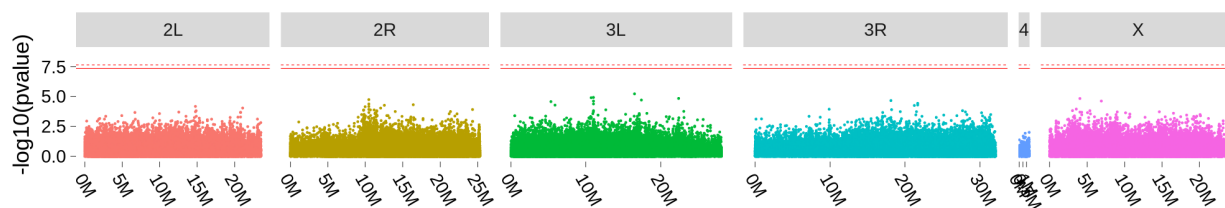

### ORFS results

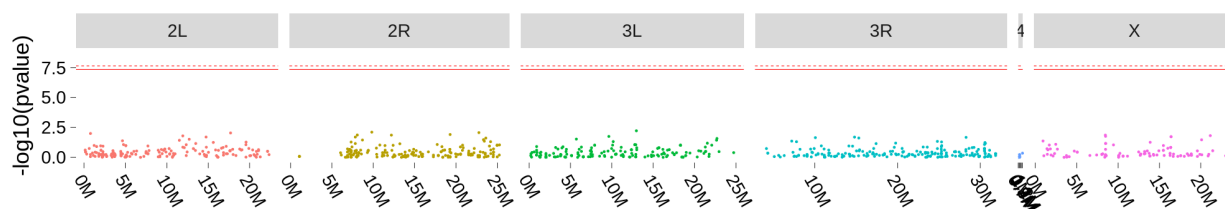

Supplement: pgen.1007699.s058.pdf [file pgen.1007699.s058.pdf]
